# Supplementary material for: The Perceived Match Between Observed and Own Bodies, but Not Its Accuracy, Is Influenced by Movement Dynamics and Clothing Cues
Source: Front Hum Neurosci. 2021 Jul 28;15:701872. doi: 10.3389/fnhum.2021.701872 (PMC8355368; doi:10.3389/fnhum.2021.701872)
Supplement: Supplementary file 2 [file Table_2.csv]

Dataset 2. Raw data for all questionnaires.
BFI-10 = Big Five Inventory-10
BESAA = Body Esteem Scale for Adolescents and Adults
	BFI-10					BESAA
ID	Extraversion	Agreeableness	Conscientiousness	Neuroticism	Openess	Appearance	Attribution	Weight
1	2.50	3.50	4.00	2.50	5.00	3.70	3.00	3.13
2	3.00	2.00	4.50	3.00	4.00	2.80	2.80	2.63
3	3.50	2.00	2.50	3.00	2.00	2.70	2.80	3.00
4	1.50	2.50	4.00	3.50	2.00	0.90	1.20	0.50
5	2.00	3.00	2.50	2.00	4.00	1.90	2.40	1.88
6	4.00	3.50	4.50	3.50	3.50	3.10	3.00	3.38
7	3.50	4.00	5.00	2.00	5.00	2.80	2.00	4.00
8	3.00	2.50	4.00	1.00	4.00	2.30	2.00	1.88
9	4.00	4.00	4.00	3.50	4.00	3.50	3.20	3.63
10	4.00	3.00	2.50	3.00	3.50	3.20	2.20	3.88
11	3.00	2.50	3.00	4.00	4.50	3.00	2.40	3.50
12	4.00	2.50	3.50	2.50	2.50	2.30	2.20	2.75
13	2.50	2.50	4.50	3.50	5.00	2.40	3.00	3.00
14	2.00	2.50	4.00	4.00	3.50	1.10	2.40	1.38
15	2.50	3.50	4.00	3.00	3.50	2.40	2.40	2.25
